# Supplementary material for: High-Multiplex Aptamer-Based Serum Proteomics to Identify Candidate Serum Biomarkers of Oral Squamous Cell Carcinoma
Source: MDPI journal article supplement (doi:10.3390/cancers15072071), 2023-03-30
Supplement: s1 [file s1]

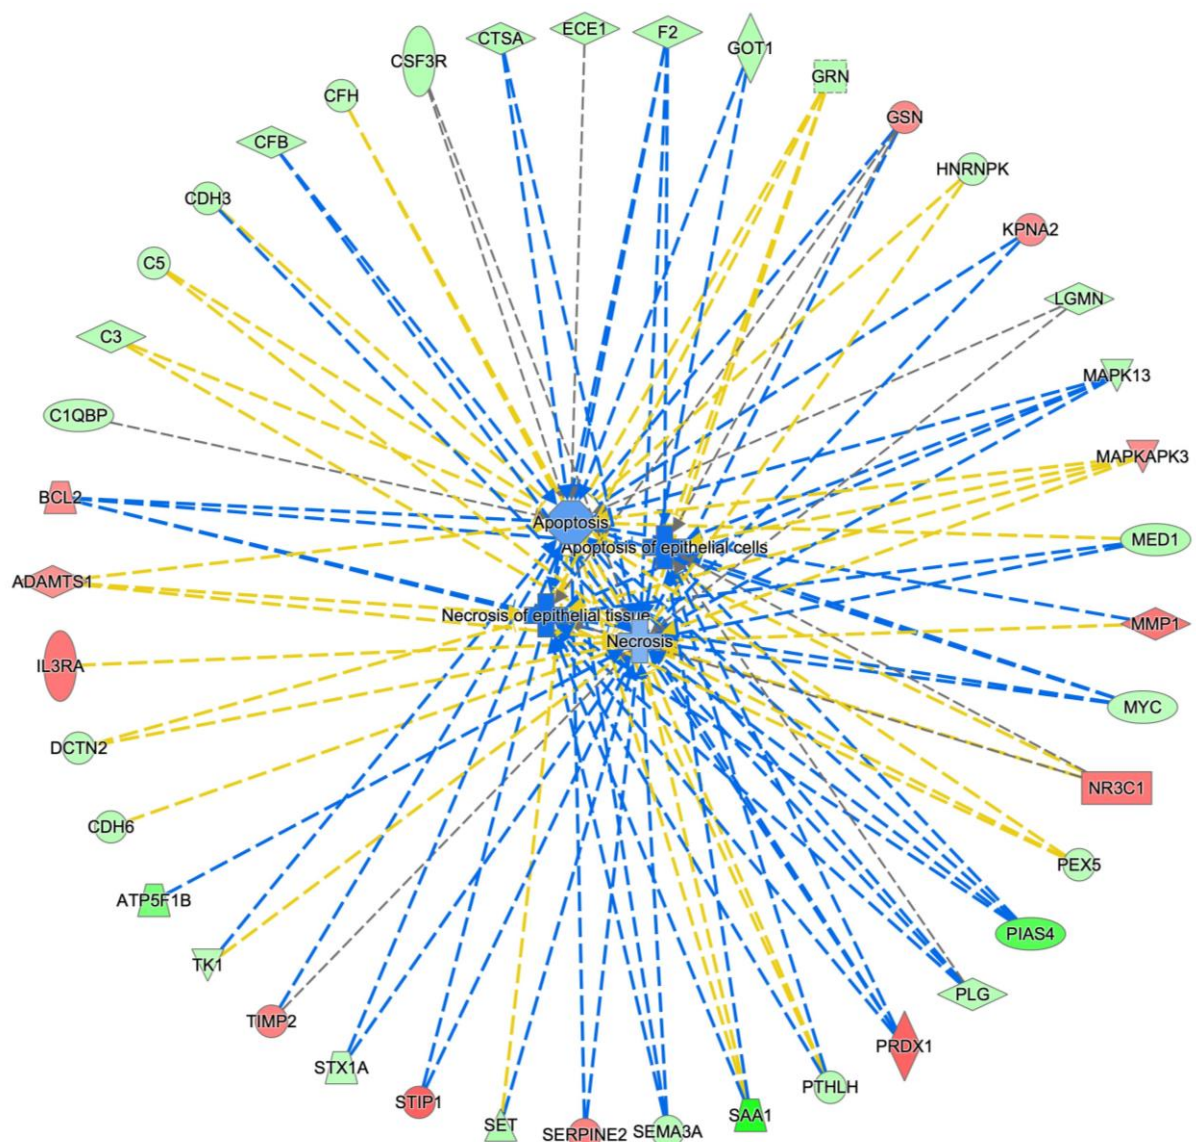

**Supplementary Figure S1A. Systems biology analysis of 63 OSCC-associated proteins.** The OSCC-associated proteins linked to cell death of epithelial cells, apoptosis, and necrosis. Red = upregulation, Green = downregulation of the targets. Arrow: directions of impact.

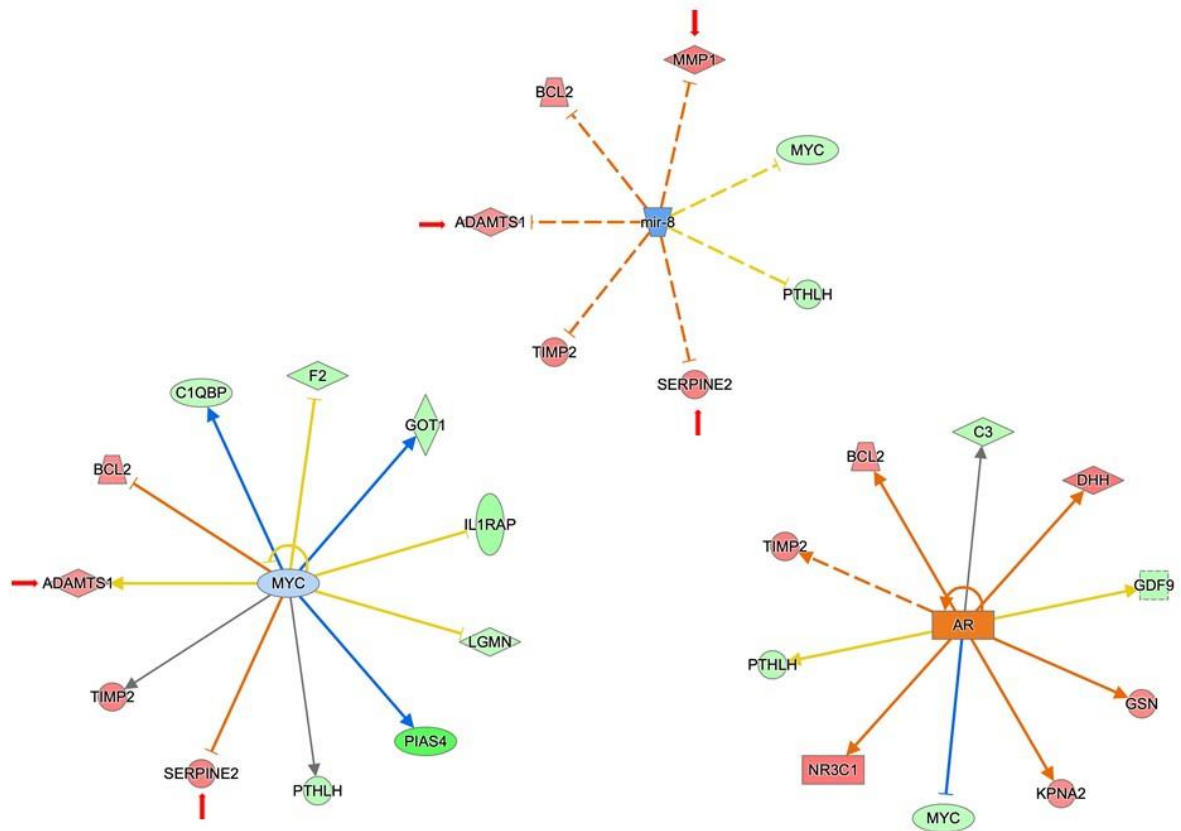

**Supplementary Figure S1B. Systems biology analysis of 63 OSCC-associated proteins.** MYC, AR, and miR-8 interactions as upstream regulators. Red = upregulation, Green = downregulation of the targets. Arrow: directions of impact, T-sign: inhibition. Orange lines represent activated states and blue lines represent inhibited states. Yellow represents indeterminate and grey if the experimental findings do not agree with the predicted effect. Red for the biological effects indicates enhanced activity and blue reduced activity.

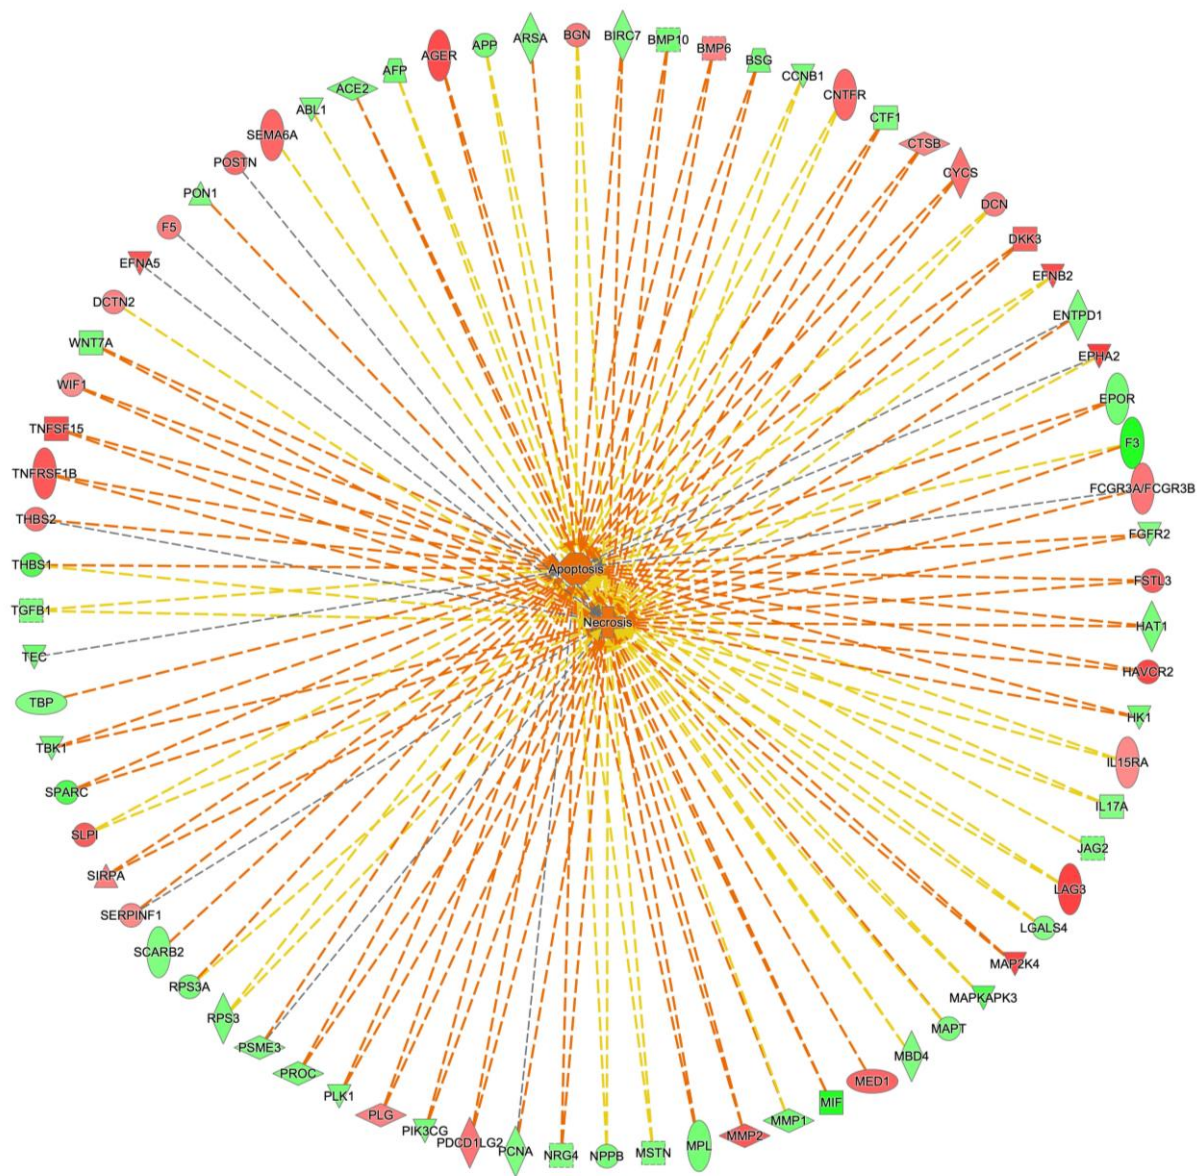

**Supplementary Figure S2A. Systems biology analysis of 121 OSCC resection-associated proteins.** The OSCC resection-associated proteins linked to necrosis of epithelial cells, apoptosis, and necrosis.

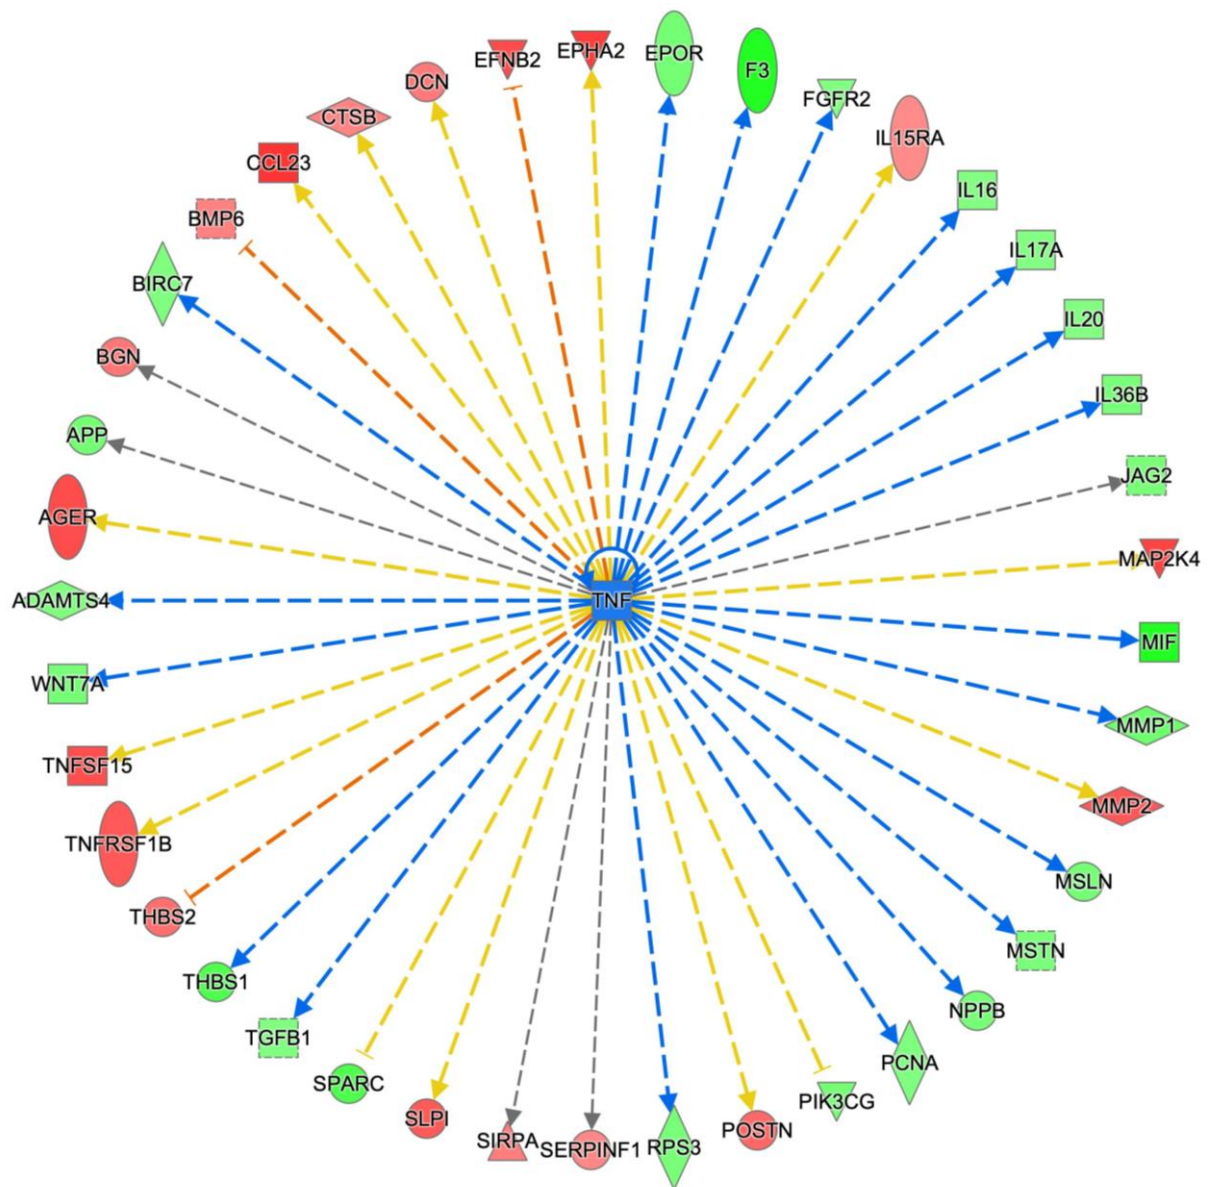

**Supplementary Figure S2B. Systems biology analysis of 121 OSCC resection-associated proteins.** TNF interactions as upstream regulators. Red = upregulation, Green = downregulation of the targets. Arrow: directions of impact, T-sign: inhibition. Orange lines represent activated states and blue lines represent inhibited states. Yellow represents indeterminate and black if the experimental findings do not agree with the predicted effect. Red for the biological effects indicates enhanced activity and blue reduced activity.

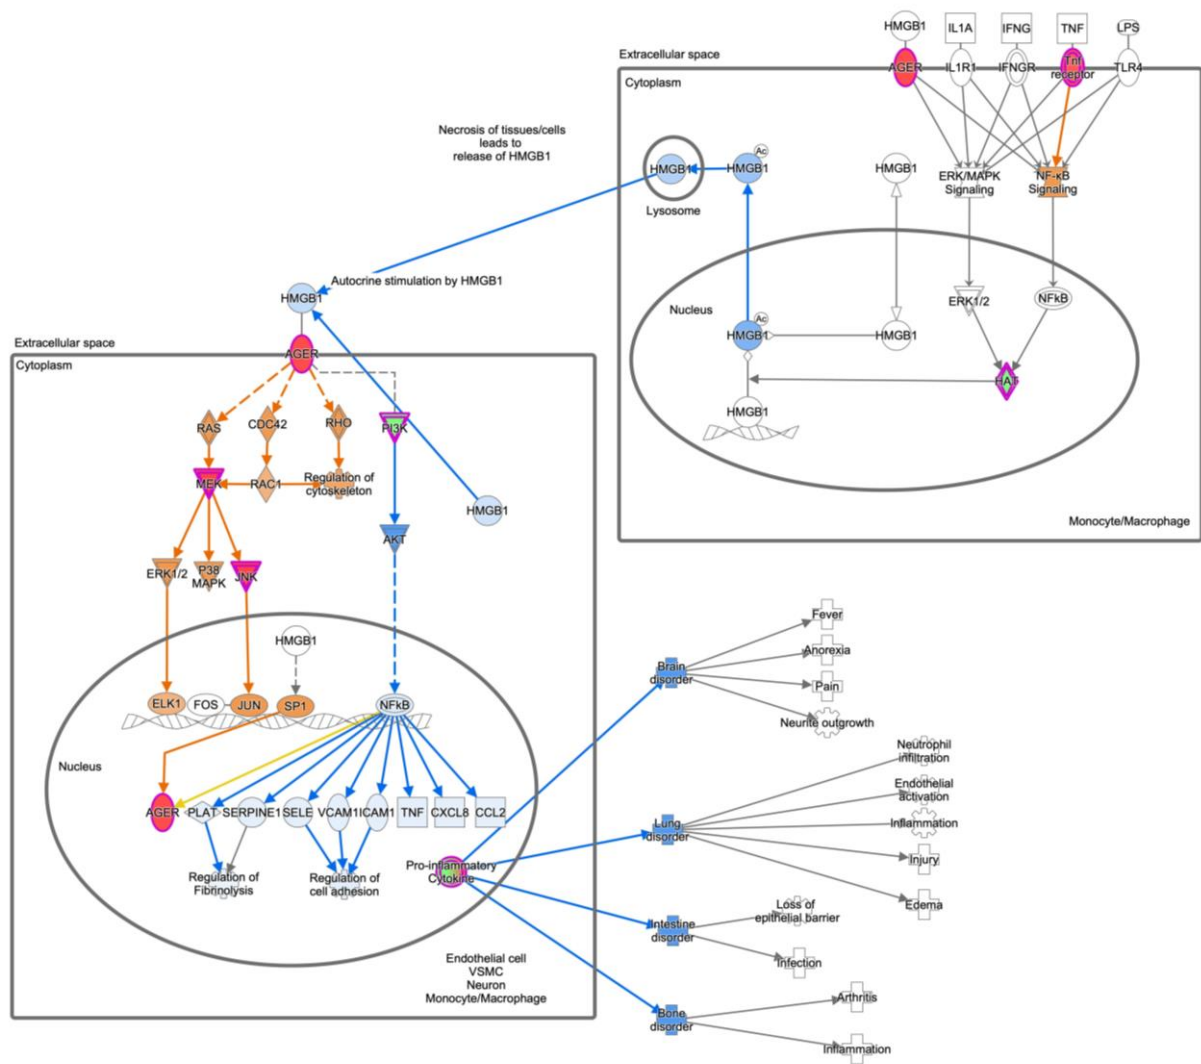

**Supplementary Figure S2C. Systems biology analysis of 121 OSCC resection-associated proteins.** High-mobility group box 1 (HMGB1) pathway as key regulator to discriminate between pre- and post-resection sera ( $p < 0.05$ ). Red = upregulated, green = downregulated.

| Supplementary Table S1. Top Up-Regulated and Down-Regulated Proteins Between ENT2 and ENT1 in OSCC Cases |                                                                        |                             |                    |                   |             |             |
|----------------------------------------------------------------------------------------------------------|------------------------------------------------------------------------|-----------------------------|--------------------|-------------------|-------------|-------------|
| Increased in ENT2 in OSCC                                                                                |                                                                        |                             |                    | OSCC ENT2 vs ENT1 |             |             |
| Somaid                                                                                                   | Protein Name                                                           | Target                      | Entrez Gene Symbol | p-val             | mean FC     | median FC   |
| SL003301                                                                                                 | <b>Ck-beta-8-1</b>                                                     | <b>Ck-b-8-1</b>             | <b>CCL23</b>       | <b>0.03302463</b> | <b>1.81</b> | <b>1.93</b> |
| SL008574                                                                                                 | Osteomodulin                                                           | OMD                         | OMD                | 0.03472337        | 1.69        | 1.90        |
| SL004579                                                                                                 | Macrophage mannose receptor 1                                          | Macrophage mannose receptor | MRC1               | 0.04120763        | 1.44        | 1.89        |
| SL002654                                                                                                 | Ephrin type-A receptor 2                                               | Epithelial cell kinase      | EPHA2              | 0.03671686        | 1.59        | 1.83        |
| SL005195                                                                                                 | Lymphocyte activation gene 3 protein                                   | LAG-3                       | LAG3               | 0.03762533        | 1.71        | 1.78        |
| SL014070                                                                                                 | SLIT and NTRK-like protein 5                                           | SLIK5                       | SLITRK5            | 0.04633227        | 1.60        | 1.77        |
| SL007237                                                                                                 | Dual specificity mitogen-activated protein kinase kinase 4             | MP2K4                       | MAP2K4             | 0.01697816        | 1.67        | 1.76        |
| SL007547                                                                                                 | Hepatitis A virus cellular receptor 2                                  | TIMD3                       | HAVCR2             | 0.03365328        | 1.71        | 1.75        |
| SL005231                                                                                                 | Netrin receptor UNC5D                                                  | UNC5H4                      | UNC5D              | 0.03117104        | 1.58        | 1.70        |
| SL007274                                                                                                 | Ephrin-B2                                                              | EFNB2                       | EFNB2              | 0.03265511        | 1.76        | 1.69        |
| SL003680                                                                                                 | Advanced glycosylation end product-specific receptor, soluble          | sRAGE                       | AGER               | 0.02730538        | 1.64        | 1.68        |
| SL004686                                                                                                 | Tumor necrosis factor ligand superfamily member 15                     | TNFSF15                     | TNFSF15            | 0.02785529        | 1.72        | 1.66        |
| SL004141                                                                                                 | Ephrin-A5                                                              | EFNA5                       | EFNA5              | 0.03781306        | 1.57        | 1.61        |
| SL000124                                                                                                 | 72 kDa type IV collagenase                                             | MMP-2                       | MMP2               | 0.04128451        | 1.48        | 1.57        |
| SL001800                                                                                                 | Tumor necrosis factor receptor superfamily member 1B                   | TNF sR-II                   | TNFRSF1B           | 0.04152369        | 1.38        | 1.57        |
| SL001888                                                                                                 | Antileukoproteinase                                                    | SLPI                        | SLPI               | 0.03650918        | 1.41        | 1.55        |
| SL005115                                                                                                 | Spondin-1                                                              | Spondin-1                   | SPON1              | 0.0475309         | 1.27        | 1.53        |
| SL009324                                                                                                 | Follistatin-related protein 3                                          | FSTL3                       | FSTL3              | 0.042269          | 1.33        | 1.53        |
| SL009412                                                                                                 | Dickkopf-related protein 3                                             | DKK3                        | DKK3               | 0.01982           | 1.46        | 1.50        |
| SL006924                                                                                                 | Agouti-related protein                                                 | ART                         | AGRP               | 0.02632341        | 1.39        | 1.49        |
| SL010328                                                                                                 | <b>Mediator of RNA polymerase II transcription subunit 1</b>           | <b>MED-1</b>                | <b>MED1</b>        | <b>0.00419701</b> | <b>1.38</b> | <b>1.46</b> |
| SL005214                                                                                                 | Semaphorin-6A                                                          | Semaphorin-6A               | SEMA6A             | 0.02577428        | 1.62        | 1.44        |
| SL004140                                                                                                 | Ephrin-A4                                                              | Ephrin-A4                   | EFNA4              | 0.04090624        | 1.37        | 1.43        |
| SL005153                                                                                                 | Ciliary neurotrophic factor receptor subunit alpha                     | CNTRF alpha                 | CNTRF              | 0.03959794        | 1.53        | 1.42        |
| SL005084                                                                                                 | Periostin                                                              | Periostin                   | POSTN              | 0.03877483        | 1.38        | 1.42        |
| SL007206                                                                                                 | Thrombospondin-2                                                       | TSP2                        | THBS2              | 0.04459738        | 1.25        | 1.35        |
| SL000396                                                                                                 | Cytochrome c                                                           | Cytochrome c                | CYCS               | 0.03612491        | 1.27        | 1.35        |
| SL000158                                                                                                 | Glutamate carboxypeptidase 2                                           | PSMA                        | FOLH1              | 0.04540058        | 1.33        | 1.35        |
| SL004661                                                                                                 | Aggrecan core protein                                                  | Aggrecan                    | ACAN               | 0.03675978        | 1.31        | 1.31        |
| SL004862                                                                                                 | <b>Programmed cell death 1 ligand 2</b>                                | <b>PD-L2</b>                | <b>PDCD1LG2</b>    | <b>0.04814705</b> | <b>1.41</b> | <b>1.31</b> |
| SL008609                                                                                                 | Low affinity immunoglobulin gamma Fc region receptor III-B             | FCG3B                       | FCGR3B             | 0.03538217        | 1.22        | 1.29        |
| SL007804                                                                                                 | Biglycan                                                               | BGN                         | BGN                | 0.01890219        | 1.45        | 1.29        |
| SL003915                                                                                                 | Kallikrein-8                                                           | kallikrein 8                | KLK8               | 0.0498659         | 1.28        | 1.28        |
| SL010391                                                                                                 | WAP, Kazal, immunoglobulin, Kunitz and NTR domain-containing protein 2 | WFKN2                       | WFIKKN2            | 0.045237          | 1.55        | 1.28        |
| SL004081                                                                                                 | Decorin                                                                | Bone proteoglycan II        | DCN                | 0.02037425        | 1.23        | 1.26        |
| SL014270                                                                                                 | CMRF35-like molecule 6                                                 | CLM6                        | CD300C             | 0.04696386        | 1.37        | 1.25        |
| SL000622                                                                                                 | Coagulation Factor V                                                   | Coagulation Factor V        | F5                 | 0.03328398        | 1.23        | 1.24        |
| SL016928                                                                                                 | SLAM family member 7                                                   | SLAF7                       | SLAMF7             | 0.03934254        | 1.32        | 1.23        |
| SL016128                                                                                                 | <b>Thioredoxin domain-containing protein 12</b>                        | <b>TXD12</b>                | <b>TXNDC12</b>     | <b>0.0303045</b>  | <b>1.17</b> | <b>1.21</b> |
| SL008967                                                                                                 | Tyrosine-protein phosphatase non-receptor type substrate 1             | SHPS1                       | SIRPA              | 0.04851118        | 1.34        | 1.21        |
| SL000268                                                                                                 | <b>Angiostatin</b>                                                     | <b>Angiostatin</b>          | <b>PLG</b>         | <b>0.04848184</b> | <b>1.21</b> | <b>1.19</b> |
| SL009207                                                                                                 | <b>Dynactin subunit 2</b>                                              | <b>Dynactin subunit 2</b>   | <b>DCTN2</b>       | <b>0.01861232</b> | <b>1.23</b> | <b>1.19</b> |
| SL003993                                                                                                 | Bone morphogenetic protein 6                                           | BMP-6                       | BMP6               | 0.04111271        | 1.17        | 1.19        |
| SL000343                                                                                                 | Cathepsin B                                                            | Cathepsin B                 | CTSB               | 0.01261039        | 1.15        | 1.16        |
| SL004646                                                                                                 | Layilin                                                                | Layilin                     | LAYN               | 0.03565695        | 1.11        | 1.12        |
| SL005200                                                                                                 | MHC class I polypeptide-related sequence B                             | MICB                        | MICB               | 0.02680499        | 1.21        | 1.12        |
| SL003066                                                                                                 | Pigment epithelium-derived factor                                      | PEDF                        | SERPINF1           | 0.0199362         | 1.09        | 1.12        |
| SL004151                                                                                                 | Interleukin-15 receptor subunit alpha                                  | IL-15 Ra                    | IL15RA             | 0.01978671        | 1.13        | 1.10        |
| SL014292                                                                                                 | Sialic acid-binding Ig-like lectin 14                                  | SIG14                       | SIGLEC14           | 0.0307794         | 1.27        | 1.09        |
| SL004652                                                                                                 | Wnt inhibitory factor 1                                                | WIF-1                       | WIF1               | 0.00808169        | 1.07        | 1.07        |
| SL000459                                                                                                 | Immunoglobulin A                                                       | IgA                         | IGHA1 IGH2         | 0.04454073        | 1.13        | 1.04        |

| Decreased in ENT2 in OSCC |                                                                                |                               |                      |                   |              |              |
|---------------------------|--------------------------------------------------------------------------------|-------------------------------|----------------------|-------------------|--------------|--------------|
|                           |                                                                                |                               |                      | OSCC ENT2 vs ENT1 |              |              |
| Somald                    | Protein Name                                                                   | Target                        | Entrez Gene Symbol   | p-val             | mean FC      | median FC    |
| SL000382                  | Creatine kinase M-type:Creatine kinase B-type heterodimer                      | CK-MB                         | CKB CKM              | 0.02986242        | -1.55        | -1.93        |
| SL003080                  | Macrophage migration inhibitory factor                                         | MIF                           | MIF                  | 0.03432143        | -1.66        | -1.86        |
| SL000024                  | Tissue Factor                                                                  | TF                            | F3                   | 0.04665021        | -1.54        | -1.83        |
| SL006694                  | Beta-Ala-His dipeptidase                                                       | CNDP1                         | CNDP1                | 0.03254756        | -1.32        | -1.55        |
| SL000532                  | SPARC                                                                          | ON                            | SPARC                | 0.0266873         | -1.32        | -1.47        |
| SL002705                  | Thrombospondin-1                                                               | Thrombospondin-1              | THBS1                | 0.00051756        | -1.42        | -1.46        |
| <b>SL004765</b>           | <b>MAP kinase-activated protein kinase 3</b>                                   | <b>MAPKAPK3</b>               | <b>MAPKAPK3</b>      | <b>0.00123178</b> | <b>-1.51</b> | <b>-1.46</b> |
| SL006830                  | Complement factor H-related protein 5                                          | complement factor H-related 5 | CFHR5                | 0.0168557         | -1.29        | -1.35        |
| SL017328                  | Myosin-binding protein C, slow-type                                            | MYPC1                         | MYBPC1               | 0.00678106        | -1.24        | -1.27        |
| <b>SL010466</b>           | <b>Membrane frizzled-related protein</b>                                       | <b>MFRP</b>                   | <b>MFRP</b>          | <b>0.03386618</b> | <b>-1.22</b> | <b>-1.25</b> |
| SL004253                  | Estradiol 17-beta-dehydrogenase 1                                              | 17-beta-HSD 1                 | HSD17B1              | 0.02386383        | -1.21        | -1.23        |
| SL000011                  | alpha-Fetoprotein                                                              | AFP                           | AFP                  | 0.00062497        | -1.21        | -1.22        |
| <b>SL000521</b>           | <b>Interstitial collagenase</b>                                                | <b>MMP-1</b>                  | <b>MMP1</b>          | <b>0.00896012</b> | <b>-1.21</b> | <b>-1.21</b> |
| SL010518                  | Tyrosine-protein kinase Tec                                                    | TEC                           | TEC                  | 0.01272388        | -1.24        | -1.21        |
| SL004938                  | Calcium/calmodulin-dependent protein kinase kinase 1                           | CaMKK alpha                   | CAMKK1               | 0.00833497        | -1.26        | -1.21        |
| SL011180                  | Hexokinase-1                                                                   | HKK1                          | HK1                  | 0.003176          | -1.24        | -1.19        |
| <b>SL009791</b>           | <b>Heterogeneous nuclear ribonucleoprotein A/B</b>                             | <b>hnRNP A/B</b>              | <b>HNRNPAB</b>       | <b>0.02347986</b> | <b>-1.22</b> | <b>-1.19</b> |
| SL009341                  | Basigin                                                                        | BASI                          | BSG                  | 0.04242972        | -1.19        | -1.18        |
| SL004469                  | Amyloid beta A4 protein                                                        | amyloid precursor protein     | APP                  | 0.01340295        | -1.25        | -1.16        |
| SL007640                  | C-type lectin domain family 7 member A                                         | CLEC7A                        | CLEC7A               | 0.009192          | -1.15        | -1.16        |
| SL005159                  | Erythropoietin receptor                                                        | EPO-R                         | EPOR                 | 0.03180034        | -1.13        | -1.15        |
| SL005224                  | Thrombopoietin Receptor                                                        | Thrombopoietin Receptor       | MPL                  | 0.0420125         | -1.15        | -1.15        |
| SL007056                  | Bone morphogenetic protein 10                                                  | BMP10                         | BMP10                | 0.04172684        | -1.16        | -1.15        |
| SL003974                  | Activated Protein C                                                            | Activated Protein C           | PROC                 | 0.02100606        | -1.19        | -1.15        |
| SL007747                  | Serine/threonine-protein kinase TBK1                                           | TBK1                          | TBK1                 | 0.01772599        | -1.15        | -1.14        |
| SL004415                  | Angiotensin-converting enzyme 2                                                | ACE2                          | ACE2                 | 0.02525962        | -1.09        | -1.14        |
| SL020172                  | Relaxin receptor 1                                                             | RXF1                          | RXFP1                | 0.01055514        | -1.19        | -1.14        |
| SL007250                  | Phosphatidylinositol 4,5-bisphosphate 3-kinase catalytic subunit gamma isoform | PK3CG                         | PIK3CG               | 0.04439932        | -1.19        | -1.13        |
| SL007888                  | Cystatin-S                                                                     | Cystatin-S                    | CST4                 | 0.04186425        | -1.12        | -1.13        |
| SL001905                  | Mesothelin                                                                     | Mesothelin                    | MSLN                 | 0.01134815        | -1.12        | -1.13        |
| SL018587                  | Immunoglobulin superfamily containing leucine-rich repeat protein 2            | ISLR2                         | ISLR2                | 0.0191338         | -1.24        | -1.13        |
| SL005258                  | Serine/threonine-protein kinase PLK1                                           | PLK-1                         | PLK1                 | 0.0282241         | -1.12        | -1.12        |
| SL011588                  | 40S ribosomal protein S3a                                                      | RS3A                          | RPS3A                | 0.02953075        | -1.15        | -1.12        |
| SL009951                  | Protein Wnt-7a                                                                 | WNT7A                         | WNT7A                | 0.03339452        | -1.10        | -1.12        |
| SL000306                  | Brain natriuretic peptide 32                                                   | BNP-32                        | NPPB                 | 0.00647505        | -1.17        | -1.12        |
| SL008378                  | Eukaryotic translation initiation factor 4E-binding protein 2                  | 4EBP2                         | EIF4EBP2             | 0.04397662        | -1.16        | -1.12        |
| SL011708                  | cAMP-regulated phosphoprotein 19                                               | ARP19                         | ARPP19               | 0.00611009        | -1.18        | -1.12        |
| SL008059                  | 40S ribosomal protein S3                                                       | RS3                           | RPS3                 | 0.03730939        | -1.11        | -1.12        |
| SL014209                  | Killer cell lectin-like receptor subfamily F member 1                          | KLRF1                         | KLRF1                | 0.02624641        | -1.17        | -1.12        |
| SL004230                  | Microtubule-associated protein tau                                             | tau                           | MAPT                 | 0.03085204        | -1.16        | -1.11        |
| SL014289                  | Killer cell immunoglobulin-like receptor 3DS1                                  | KI3S1                         | KIR3DS1              | 0.0108866         | -1.19        | -1.11        |
| SL004725                  | Histone acetyltransferase type B catalytic subunit                             | Hat1                          | HAT1                 | 0.03038019        | -1.17        | -1.11        |
| SL002071                  | Gastrin-releasing peptide                                                      | Gastrin-releasing peptide     | GRP                  | 0.02100769        | -1.12        | -1.11        |
| SL005179                  | Interleukin-36 beta                                                            | IL-1F8                        | IL36B                | 0.01041349        | -1.14        | -1.11        |
| SL000130                  | G2/mitotic-specific cyclin-B1                                                  | Cyclin B1                     | CCNB1                | 0.01719849        | -1.18        | -1.10        |
| SL007774                  | Protein jagged-2                                                               | JAG2                          | JAG2                 | 0.02857578        | -1.12        | -1.10        |
| SL016548                  | AMP Kinase (alpha1beta1gamma1)                                                 | AMPK a1b1g1                   | PRKAA1 PRKAB1 PRKAG1 | 0.02868372        | -1.15        | -1.09        |
| SL005308                  | Proteasome activator complex subunit 3                                         | PSME3                         | PSME3                | 0.0293512         | -1.15        | -1.09        |
| SL005493                  | Serum paraoxonase/arylesterase 1                                               | paraoxonase 1                 | PON1                 | 0.02229908        | -1.13        | -1.08        |
| SL004357                  | Growth/differentiation factor 8                                                | Myostatin                     | MSTN                 | 0.04847629        | -1.17        | -1.08        |
| SL008590                  | Olfactomedin-4                                                                 | Olfactomedin-4                | OLFM4                | 0.04469905        | -1.14        | -1.08        |
| SL010371                  | Ectonucleoside triphosphate diphosphohydrolase 1                               | CD39                          | ENTPD1               | 0.03562801        | -1.18        | -1.08        |
| SL010504                  | MAP kinase-activated protein kinase 5                                          | MAPK5                         | MAPKAPK5             | 0.02438916        | -1.18        | -1.08        |
| SL005392                  | Arylsulfatase A                                                                | Arylsulfatase A               | ARSA                 | 0.02669418        | -1.11        | -1.07        |
| SL005158                  | C-type lectin domain family 4 member M                                         | DC-SIGNR                      | CLEC4M               | 0.04750993        | -1.18        | -1.07        |
| SL006892                  | Tyrosine-protein kinase ABL1                                                   | ABL1                          | ABL1                 | 0.03627768        | -1.11        | -1.07        |
| SL005197                  | Lysosome membrane protein 2                                                    | LIMP II                       | SCARB2               | 0.02261501        | -1.13        | -1.06        |
| SL004625                  | A disintegrin and metalloproteinase with thrombospondin motifs 4               | ADAMTS-4                      | ADAMTS4              | 0.00534062        | -1.09        | -1.06        |
| SL009629                  | Methyl-CpG-binding domain protein 4                                            | MBD4                          | MBD4                 | 0.04776494        | -1.10        | -1.06        |
| SL002783                  | Cardiotrophin-1                                                                | Cardiotrophin-1               | CTF1                 | 0.02698703        | -1.07        | -1.05        |
| SL000131                  | Proliferating cell nuclear antigen                                             | PCNA                          | PCNA                 | 0.03904086        | -1.12        | -1.05        |
| SL004299                  | Baculoviral IAP repeat-containing protein 7 Isoform beta                       | Livin B                       | BIRC7                | 0.04649281        | -1.05        | -1.05        |
| SL007828                  | Neuregulin-4                                                                   | NRG4                          | NRG4                 | 0.02206438        | -1.10        | -1.05        |
| SL000584                  | Transforming growth factor beta-1                                              | TGF-b1                        | TGFB1                | 0.04174855        | -1.07        | -1.04        |
| SL004346                  | Interleukin-20                                                                 | IL-20                         | IL20                 | 0.04854244        | -1.04        | -1.03        |
| SL003990                  | Fibroblast growth factor receptor 2                                            | FGFR-2                        | FGFR2                | 0.02699095        | -1.11        | -1.02        |
| SL006923                  | TATA-box-binding protein                                                       | TBP                           | TBP                  | 0.01659501        | -1.05        | -1.02        |
| SL000474                  | Interleukin-16                                                                 | IL-16                         | IL16                 | 0.02977617        | -1.06        | -1.02        |
| SL001713                  | Interleukin-17A                                                                | IL-17                         | IL17A                | 0.01722795        | -1.12        | -1.02        |
| SL005165                  | Galectin-4                                                                     | Galectin-4                    | LGALS4               | 0.04953144        | -1.09        | -1.02        |

| Supplementary Table S2. Top Up-Regulated and Down-Regulated Proteins Between OSCC Cases and Healthy Controls |                                                                      |                                        |                       |                      |              |              |
|--------------------------------------------------------------------------------------------------------------|----------------------------------------------------------------------|----------------------------------------|-----------------------|----------------------|--------------|--------------|
| Increased in OSCC                                                                                            |                                                                      |                                        |                       |                      |              |              |
| Somald                                                                                                       | Protein Name                                                         | Target                                 | Entrez Gene Symbol    | OSCC vs Con<br>p-val | mean FC      | median FC    |
| SL004296                                                                                                     | Adenylate kinase isoenzyme 1                                         | Myokinase, human                       | AK1                   | 0.04032307           | 2.21         | 2.09         |
| SL000836                                                                                                     | Hemoglobin                                                           | Hemoglobin                             | HBA1 HBB              | 0.01200661           | 1.99         | 1.96         |
| SL011073                                                                                                     | Xaa-Pro aminopeptidase 1                                             | XPNPEP1                                | XPNPEP1               | 0.04763114           | 1.90         | 1.79         |
| SL008039                                                                                                     | Alcohol dehydrogenase [NADP(+)]                                      | AK1A1                                  | AKR1A1                | 0.01399805           | 1.65         | 1.77         |
| SL016550                                                                                                     | Casein kinase II 2-alpha:2-beta heterotetramer                       | CK2-A1:8                               | CSNK2A1 CSNK2B        | 0.03407762           | 1.53         | 1.71         |
| <b>SL010250</b>                                                                                              | <b>Stress-induced-phosphoprotein 1</b>                               | <b>Stress-induced-phosphoprotein 1</b> | <b>STIP1</b>          | <b>0.0401434</b>     | <b>1.69</b>  | <b>1.61</b>  |
| SL004919                                                                                                     | Peroxiredoxin-1                                                      | Peroxiredoxin-1                        | PRDX1                 | 0.0429796            | 1.51         | 1.59         |
| SL005187                                                                                                     | Interleukin-3 receptor subunit alpha                                 | IL-3 Ra                                | IL3RA                 | 0.03413965           | 1.48         | 1.40         |
| <b>SL000521</b>                                                                                              | <b>Interstitial collagenase</b>                                      | <b>MMP-1</b>                           | <b>MMP1</b>           | <b>0.00679146</b>    | <b>1.49</b>  | <b>1.39</b>  |
| SL007003                                                                                                     | Desert hedgehog protein N-product                                    | DHH                                    | DHH                   | 0.04786586           | 1.47         | 1.39         |
| SL006914                                                                                                     | Glucocorticoid receptor                                              | Glucocorticoid receptor                | NR3C1                 | 0.02947505           | 1.30         | 1.39         |
| SL000592                                                                                                     | Metalloproteinase inhibitor 2                                        | TIMP-2                                 | TIMP2                 | 0.02343185           | 1.26         | 1.29         |
| <b>SL004457</b>                                                                                              | <b>Glia-derived nexin</b>                                            | <b>Protease nexin I</b>                | <b>SERPINE2</b>       | <b>0.01286922</b>    | <b>1.25</b>  | <b>1.28</b>  |
| SL003915                                                                                                     | Kallikrein-8                                                         | kallikrein 8                           | KLK8                  | 0.03721993           | 1.27         | 1.26         |
| SL005572                                                                                                     | Gelsolin                                                             | Gelsolin                               | GSN                   | 0.04365788           | 1.22         | 1.22         |
| SL004718                                                                                                     | Importin subunit alpha-1                                             | Karyopherin-a2                         | KPNA2                 | 0.00433055           | 1.17         | 1.18         |
| <b>SL010466</b>                                                                                              | <b>Membrane frizzled-related protein</b>                             | <b>MFRP</b>                            | <b>MFRP</b>           | <b>0.03615788</b>    | <b>1.16</b>  | <b>1.17</b>  |
| SL000104                                                                                                     | Apoptosis regulator Bcl-2                                            | Bcl-2                                  | BCL2                  | 0.03174288           | 1.12         | 1.16         |
| <b>SL004765</b>                                                                                              | <b>MAP kinase-activated protein kinase 3</b>                         | <b>MAPKAPK3</b>                        | <b>MAPKAPK3</b>       | <b>0.00609569</b>    | <b>1.19</b>  | <b>1.16</b>  |
| SL008421                                                                                                     | A disintegrin and metalloproteinase with thrombospondin motifs 1     | ATS1                                   | ADAMTS1               | 0.04534437           | 1.16         | 1.13         |
| SL010393                                                                                                     | Kremen protein 2                                                     | KREM2                                  | KREMEN2               | 0.04153119           | 1.20         | 1.13         |
| Decreased in OSCC                                                                                            |                                                                      |                                        |                       |                      |              |              |
| Somald                                                                                                       | Protein Name                                                         | Target                                 | Entrez Gene Symbol    | OSCC vs Con<br>p-val | mean FC      | median FC    |
| SL002756                                                                                                     | Heterogeneous nuclear ribonucleoprotein K                            | hnRNP K                                | HNRNPK                | 0.00780153           | -1.11        | -1.11        |
| SL000319                                                                                                     | Complement C5                                                        | C5                                     | C5                    | 0.04169888           | -1.17        | -1.11        |
| SL003328                                                                                                     | Complement factor I                                                  | Factor I                               | CFI                   | 0.04824177           | -1.18        | -1.12        |
| SL000415                                                                                                     | Complement factor H                                                  | Factor H                               | CFH                   | 0.04847355           | -1.13        | -1.13        |
| SL008177                                                                                                     | Complement component 1 Q subcomponent-binding protein, mitochondrial | C1QB                                   | C1QBP                 | 0.02460562           | -1.13        | -1.13        |
| SL004304                                                                                                     | Syntaxin-1A                                                          | STX1a                                  | STX1A                 | 0.03672081           | -1.29        | -1.14        |
| SL002565                                                                                                     | Myc proto-oncogene protein                                           | c-Myc                                  | MYC                   | 0.04640721           | -1.21        | -1.14        |
| SL011069                                                                                                     | Serine protease 27                                                   | Marapsin                               | PRSS27                | 0.03753767           | -1.18        | -1.15        |
| SL001973                                                                                                     | Mammaglobin-B                                                        | Mammaglobin 2                          | SCGB2A1               | 0.04172115           | -1.16        | -1.16        |
| SL000360                                                                                                     | Coagulation Factor X                                                 | Coagulation Factor X                   | F10                   | 0.04929031           | -1.21        | -1.16        |
| SL000057                                                                                                     | Thymidine kinase, cytosolic                                          | Thymidine kinase                       | TK1                   | 0.00315418           | -1.21        | -1.18        |
| <b>SL009207</b>                                                                                              | <b>Dynactin subunit 2</b>                                            | <b>Dynactin subunit 2</b>              | <b>DCTN2</b>          | <b>0.0404482</b>     | <b>-1.24</b> | <b>-1.20</b> |
| SL007059                                                                                                     | Lymphocyte antigen 86                                                | LY86                                   | LY86                  | 0.01685897           | -1.21        | -1.20        |
| SL012148                                                                                                     | Peroxisomal targeting signal 1 receptor                              | PEX5                                   | PEX5                  | 0.02068758           | -1.17        | -1.20        |
| SL008909                                                                                                     | Legumain                                                             | LGMN                                   | LGMN                  | 0.0239212            | -1.19        | -1.20        |
| SL018946                                                                                                     | Ubiquitin-conjugating enzyme E2 G2                                   | UB2G2                                  | UBE2G2                | 0.01847193           | -1.19        | -1.21        |
| SL003220                                                                                                     | C3a anaphylatoxin des Arginine                                       | C3adesArg                              | C3                    | 0.00040137           | -1.20        | -1.22        |
| <b>SL000309</b>                                                                                              | <b>Complement C1q subcomponent</b>                                   | <b>C1q</b>                             | <b>C1QA C1QB C1QC</b> | <b>0.00816457</b>    | <b>-1.28</b> | <b>-1.23</b> |
| SL004183                                                                                                     | Cadherin-3                                                           | P-Cadherin                             | CDH3                  | 0.04001921           | -1.25        | -1.24        |
| SL002561                                                                                                     | Parathyroid hormone-related protein                                  | PTHrP                                  | PTHLH                 | 0.0010905            | -1.23        | -1.24        |
| SL004865                                                                                                     | Cadherin-6                                                           | Cadherin-6                             | CDH6                  | 0.01746239           | -1.30        | -1.24        |
| SL020171                                                                                                     | HERV-H LTR-associating protein 2                                     | HHLA2                                  | HHLA2                 | 0.0252974            | -1.33        | -1.25        |
| SL010379                                                                                                     | Semaphorin-3A                                                        | Semaphorin 3A                          | SEMA3A                | 0.0023193            | -1.29        | -1.26        |
| SL006993                                                                                                     | Mitogen-activated protein kinase 13                                  | MK13                                   | MAPK13                | 0.02080795           | -1.21        | -1.26        |
| SL000414                                                                                                     | Complement factor B                                                  | Factor B                               | CFB                   | 0.02846216           | -1.19        | -1.26        |
| <b>SL000268</b>                                                                                              | <b>Angiostatin</b>                                                   | <b>Angiostatin</b>                     | <b>PLG</b>            | <b>0.00396009</b>    | <b>-1.30</b> | <b>-1.27</b> |
| SL005234                                                                                                     | Growth/differentiation factor 9                                      | GDF-9                                  | GDF9                  | 0.02368223           | -1.21        | -1.27        |
| <b>SL000586</b>                                                                                              | <b>Thrombin</b>                                                      | <b>Thrombin</b>                        | <b>F2</b>             | <b>0.0339196</b>     | <b>-1.33</b> | <b>-1.28</b> |
| SL000280                                                                                                     | Aspartate aminotransferase, cytoplasmic                              | GOT1                                   | GOT1                  | 0.01697681           | -1.32        | -1.30        |
| SL004591                                                                                                     | Granulocyte colony-stimulating factor receptor                       | G-CSF-R                                | CSF3R                 | 0.00233852           | -1.32        | -1.30        |
| SL004060                                                                                                     | Endothelin-converting enzyme 1                                       | Endothelin-converting enzyme 1         | ECE1                  | 0.00119138           | -1.34        | -1.31        |
| <b>SL007173</b>                                                                                              | <b>Granulins</b>                                                     | <b>GRN</b>                             | <b>GRN</b>            | <b>0.03783666</b>    | <b>-1.25</b> | <b>-1.33</b> |
| <b>SL010328</b>                                                                                              | <b>Mediator of RNA polymerase II transcription subunit 1</b>         | <b>MED-1</b>                           | <b>MED1</b>           | <b>0.0172352</b>     | <b>-1.29</b> | <b>-1.34</b> |
| SL009213                                                                                                     | Lysosomal protective protein                                         | Cathepsin A                            | CTSA                  | 0.02722162           | -1.34        | -1.37        |
| SL014228                                                                                                     | SLAM family member 6                                                 | SLAF6                                  | SLAMF6                | 0.02599882           | -1.42        | -1.42        |
| <b>SL007336</b>                                                                                              | <b>Protein SET</b>                                                   | <b>SET</b>                             | <b>SET</b>            | <b>0.01997398</b>    | <b>-1.40</b> | <b>-1.44</b> |
| SL004588                                                                                                     | Interleukin-1 Receptor accessory protein                             | IL-1 R AcP                             | IL1RAP                | 0.01508365           | -1.54        | -1.57        |
| SL006512                                                                                                     | Hepatocyte growth factor activator                                   | HGFA                                   | HGFAC                 | 0.03967619           | -1.63        | -1.60        |
| SL011769                                                                                                     | Acidic leucine-rich nuclear phosphoprotein 32 family member B        | AN32B                                  | ANP32B                | 0.02529884           | -1.51        | -1.66        |
| SL005675                                                                                                     | ATP synthase subunit beta, mitochondrial                             | ATP synthase beta chain                | ATP5B                 | 0.03529201           | -1.85        | -2.28        |
| SL019096                                                                                                     | E3 SUMO-protein ligase PIA54                                         | PIA54                                  | PIA54                 | 0.04046524           | -2.35        | -2.93        |
| SL000572                                                                                                     | Serum amyloid A-1 protein                                            | SAA                                    | SAA1                  | 0.00352611           | -3.87        | -3.89        |
